# Supplementary material
Source: PubMed Central journal article supplement (PMC4248868)
Supplement: JB.02172-14_zjb999093381so1.pdf [file JB.02172-14_zjb999093381so1.pdf]

**Supplemental material**

**Charge requirements of lipid II flippase activity in *Escherichia coli***

Emily K. Butler, Wee Boon Tan, Hildy Joseph, Natividad Ruiz

**A**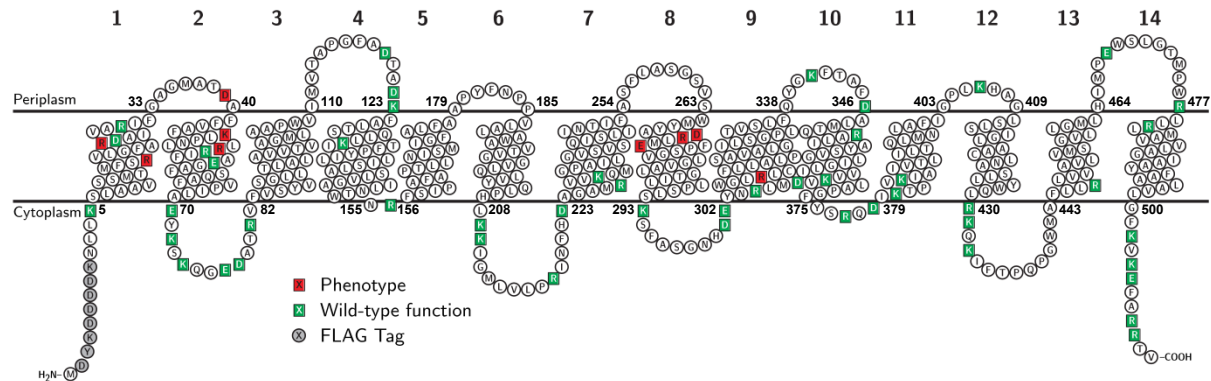

■ Phenotype  
■ Wild-type function  
○ FLAG Tag

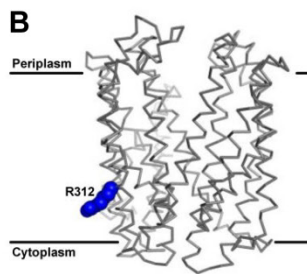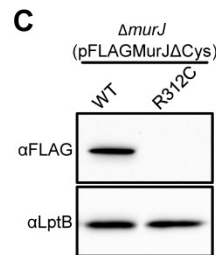

**Figure S1. Relevance of charged residues in MurJ.** (A) Charged residues whose substitution resulted in partial or total loss of function phenotype (red boxes) and wild-type function (green boxes) are shown in the topological map of MurJ (1). To generate this figure, data were compiled from this work and our previous publication, see Results section (1). N-terminal residues corresponding to the FLAG tag are highlighted in grey. Transmembrane domain (TMD) numbers are indicated at the top of the figure. Figure was prepared using the TEXTopo software package in LaTeX (2). Substitutions that affect function are located in TMDs 1, 2, 8, 9, and the periplasmic loop 1 of MurJ. Numbers indicate the residues bounding TMDs and correspond to the native MurJ sequence. (B) Structural model of MurJ (1) as viewed from the membrane plane with approximate membrane boundaries marked. The side chain of R312 is shown as spheres in blue. (C) Anti-FLAG immunoblot of samples prepared from overnight cultures shows no detectable signal from the functional FLAG-MurJ/R312C variant. Data are representative of at least three independent experiments. Anti-LptB immunoblotting was performed to control for sample loading.

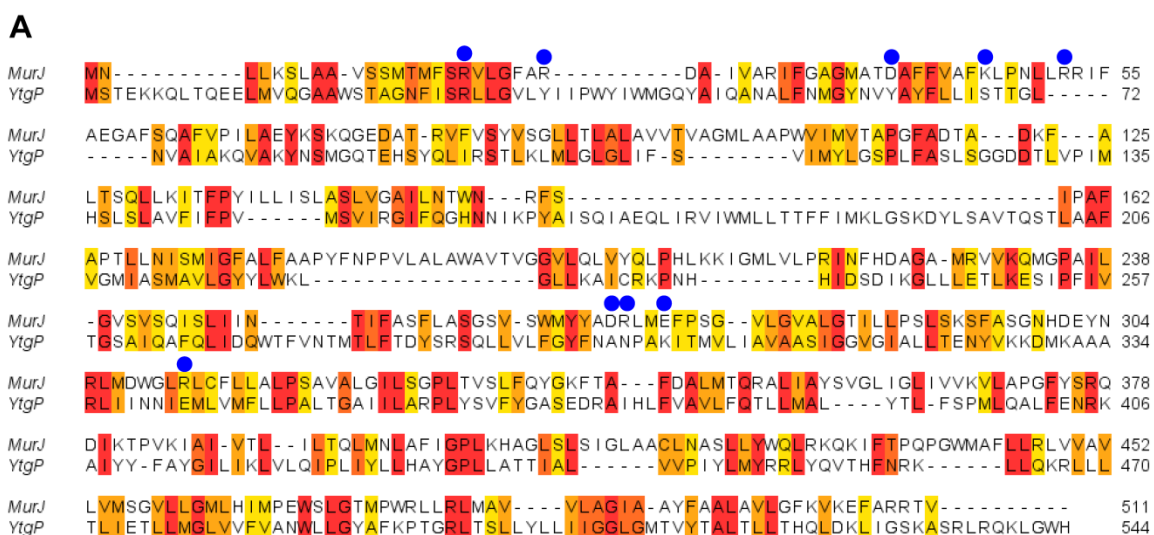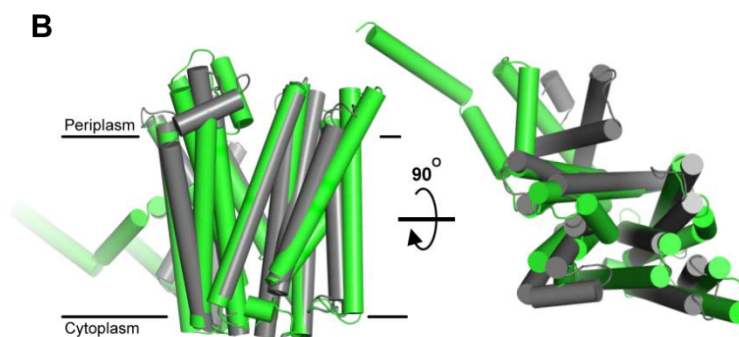

**Figure S2. Structural homologs MurJ and YtgP have low conservation at the sequence level.** (A) Alignment of the MurJ (NP\_415587) and YtgP (YP\_002285353.1) sequences using ClustalOmega (3) reveals 21.7% identity. Residues are colored according to JalView (4) conservation scores (1-10), where 10 = red, 9 = orange, and 8 = yellow. The MurJ residues critical for function (R18, R24, D39, K46, R52, D269, R270, and E273) and biogenesis (R312) are marked with blue dots. (B) Alignment of the YtgP (green) and MurJ (grey) structural models using CEalign (5) demonstrates homology between their respective TMD 1-12 regions (RMSD = 1.72 Å). These regions were modeled using the crystal structures of MOP exporters as templates (1). The topology of the remaining C-terminal region in the YtgP model remains to be investigated.

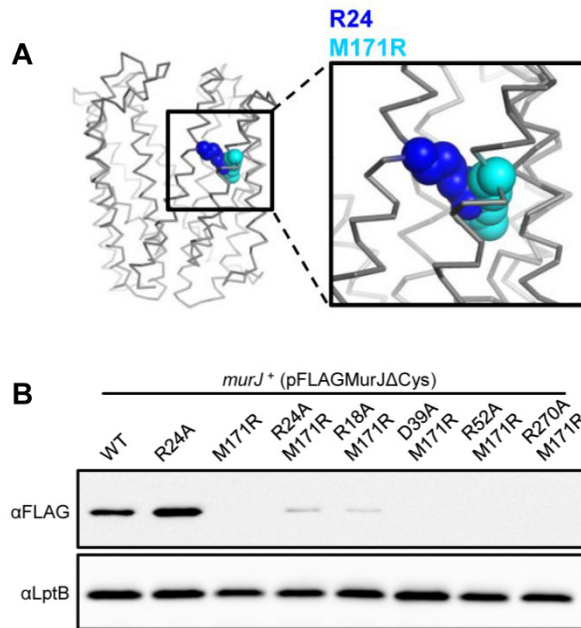

**Figure S3. The M171R substitution specifically suppresses the loss of function conferred by R24A and decreases levels of FLAG-MurJ.** (A) View of the MurJ structure from the membrane plane showing the predicted proximity of the side chains of R24 (blue spheres) and M171R (cyan spheres). (B) Anti-FLAG immunoblot detection of FLAG-MurJ. Loss-of-function D39A/M171R, R52A/M171R, and R270A/M171R variants are, like the functional M171R variant, present at a level below the limit of detection. Functional R24A/M171R and non-functional R18A/M171R are detected at similar levels, which are decreased relative to the wild-type (WT) FLAG-MurJ. Data are representative of at least three independent experiments. Anti-LptB immunoblotting was performed to control for sample loading.

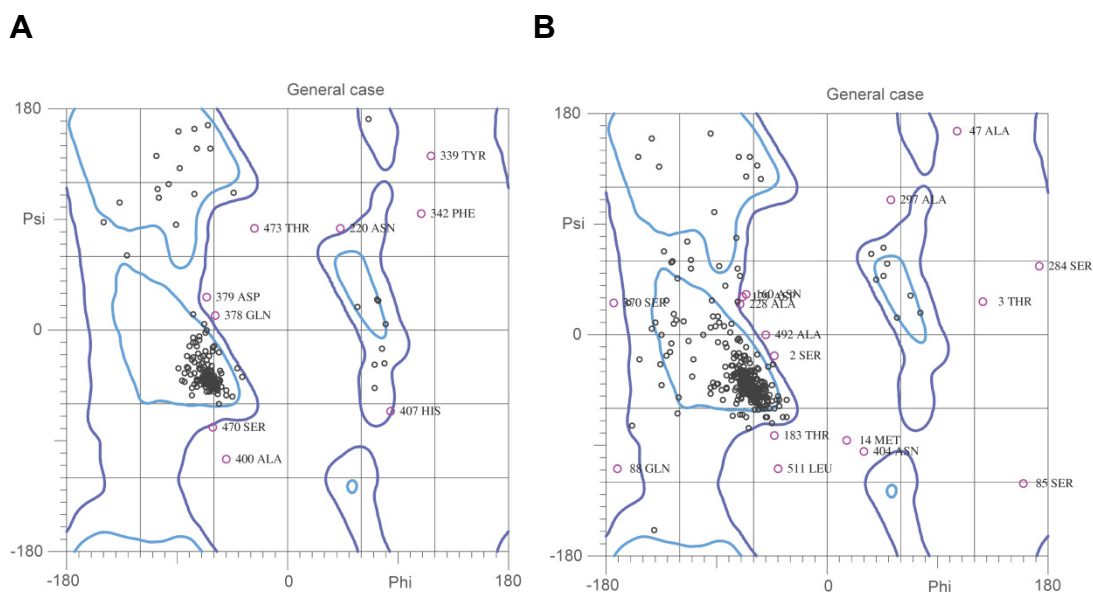

**Figure S4. Quality assessment of structural models.** Ramachandran plots show that the MurJ and YtgP structural models satisfy conformational restraints of most residues, as 98.2% of MurJ (A) and 97.05% of YtgP (B) residues were found in allowed regions. Plots were generated using the MolProbity web service (6). All charged residues in MurJ and YtgP that are relevant to this study are within allowed regions.

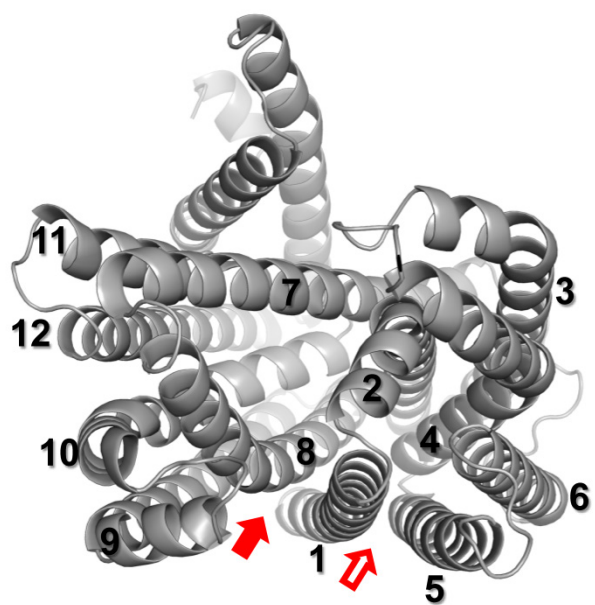

**Figure S5. Model of MurJ structure showing “open slots” between transmembrane domains.** View of the MurJ structural model from the periplasmic space, tilted to expose the putative slots between transmembrane domains 1 and 8 (red filled arrow) and transmembrane domains 1 and 5 (red open arrow). Numbers indicate transmembrane domains 1 - 12.

**Table S1. Charge conservation of specific residues in transmembrane domains 1, 2, and 8 is required for proper function of FLAG-MurJ variants.**

| Strain | Relevant genotype                            | TMD <sup>b</sup> | Efficiency of plating <sup>a</sup> |                   |
|--------|----------------------------------------------|------------------|------------------------------------|-------------------|
|        |                                              |                  | LB                                 | YT                |
| NR2131 | $\Delta murJ$ (pFLAGMurJ $\Delta$ Cys)       |                  | 1.00                               | 1.0 $\pm$ 0.7     |
| NR2893 | $\Delta murJ$ (pFLAGMurJ $\Delta$ Cys/R18K)  | 1                | 0.4 $\pm$ 0.3                      | 0.4 $\pm$ 0.3     |
| NR2894 | $\Delta murJ$ (pFLAGMurJ $\Delta$ Cys/R24K)  | 1                | 2.2 $\pm$ 1.6                      | 0.7 $\pm$ 0.3     |
| NR2687 | $\Delta murJ$ (pFLAGMurJ $\Delta$ Cys/R52A)  | 2                | 1.1 $\pm$ 0.1                      | <10 <sup>-3</sup> |
| NR2895 | $\Delta murJ$ (pFLAGMurJ $\Delta$ Cys/R52K)  | 2                | 1.5 $\pm$ 0.3                      | 2.1 $\pm$ 1.4     |
| NR2684 | $\Delta murJ$ (pFLAGMurJ $\Delta$ Cys/D269A) | 8                | 0.4 $\pm$ 0.2                      | <10 <sup>-6</sup> |
| NR2896 | $\Delta murJ$ (pFLAGMurJ $\Delta$ Cys/D269E) | 8                | 0.6 $\pm$ 0.3                      | 0.6 $\pm$ 0.3     |
| NR2897 | $\Delta murJ$ (pFLAGMurJ $\Delta$ Cys/R270K) | 8                | 0.6 $\pm$ 0.3                      | 0.1 $\pm$ 0.0     |
| NR2712 | $\Delta murJ$ (pFLAGMurJ $\Delta$ Cys/E273A) | 8                | 2.7 $\pm$ 1.5                      | <10 <sup>-4</sup> |
| NR2710 | $\Delta murJ$ (pFLAGMurJ $\Delta$ Cys/E273D) | 8                | 0.5 $\pm$ 0.1                      | 0.6 $\pm$ 0.3     |

<sup>a</sup> Efficiency of plating values for growth of haploid strains expressing *flag-murJ* alleles carrying indicated substitutions were calculated as described in Materials and Methods. A value = 1 (set by the wild-type allele) indicates full complementation by *flag-murJ* alleles; a value <1 indicates partial complementation.

<sup>b</sup> TMD indicates transmembrane domain where the substituted residue is located.

**Table S2. Sensitivity to low-osmolarity medium conferred by functional K46 and D39 variants.**

| Strain | Relevant genotype                           | Efficiency of plating <sup>a</sup> |                                   |
|--------|---------------------------------------------|------------------------------------|-----------------------------------|
|        |                                             | LB                                 | YT                                |
| NR2131 | $\Delta murJ$ (pFLAGMurJ $\Delta$ Cys)      | 1.0                                | 0.2 $\pm$ 0.0                     |
| NR2683 | $\Delta murJ$ (pFLAGMurJ $\Delta$ Cys/K46A) | 0.0 $\pm$ 0.0                      | 6.7 ( $\pm$ 3.2) $\times 10^{-4}$ |
| NR2844 | $\Delta murJ$ (pFLAGMurJ $\Delta$ Cys/K46E) | 2.1 $\pm$ 1.8                      | 3.9 ( $\pm$ 2.7) $\times 10^{-3}$ |
| NR3015 | $\Delta murJ$ (pFLAGMurJ $\Delta$ Cys/D39E) | 0.7 $\pm$ 0.3                      | 2.8 ( $\pm$ 1.4) $\times 10^{-3}$ |

<sup>a</sup> Efficiency of plating values for growth of haploid strains expressing *flag-murJ* alleles carrying indicated substitutions were calculated as described in Materials and Methods. A value = 1 indicates (set by the wild-type allele) full complementation by *flag-murJ* alleles; a value <1 indicates partial complementation.



**Table S3. Strains used in this study.**

| <b>Strain</b> | <b>Genotype</b>                                                                               | <b>Reference</b> |
|---------------|-----------------------------------------------------------------------------------------------|------------------|
| DH5α          | <i>fhuA2 lac(del)U169 phoA glnV44 Φ80' lacZ(del)M15 gyrA96 recA1 relA1 endA1 thi-1 hsdR17</i> |                  |
| MC4100        | <i>araD139, Δ(lac)U169, strA, thi</i>                                                         | (7)              |
| NR754         | <i>araD</i> <sup>+</sup> revertant of MC4100                                                  | (8)              |
| NR1152        | NR754 <i>murJ</i> Ω(-14:: <i>bla araC</i> P <sub>BAD</sub> )                                  | (9)              |
| NR2117        | NR754 <i>ΔmurJ::FRT ΔhsdR::kan</i> (pRC7MurJ)                                                 | (1)              |
| NR2131        | NR754 <i>ΔmurJ::FRT ΔhsdR::kan</i> (pFLAGMurJΔCys)                                            | (1)              |
| NR2449        | NR754 (pFLAGMurJΔCys)                                                                         | (1)              |
| NR2988        | NR754 (pFLAGMurJΔCys/R18A)                                                                    | This study       |
| NR2892        | NR754 <i>ΔmurJ::FRT ΔhsdR::kan</i> (pFLAGMurJΔCys/R18E, pRC7MurJ)                             | This study       |
| NR2935        | NR754 (pFLAGMurJΔCys/R18E)                                                                    | This study       |
| NR2893        | NR754 <i>ΔmurJ::FRT ΔhsdR::kan</i> (pFLAGMurJΔCys/R18K)                                       | This study       |
| NR3139        | NR754 <i>ΔmurJ::FRT ΔhsdR::kan</i> (pFLAGMurJΔCys/R18A/M171R, pRC7MurJ)                       | This study       |
| NR3143        | NR754 (pFLAGMurJΔCys/R18A/M171R)                                                              | This study       |
| NR2989        | NR754 (pFLAGMurJΔCys/R24A)                                                                    | This study       |
| NR2845        | NR754 <i>ΔmurJ::FRT ΔhsdR::kan</i> (pFLAGMurJΔCys/R24E, pRC7MurJ)                             | This study       |
| NR2851        | NR754 (pFLAGMurJΔCys/R24E)                                                                    | This study       |
| NR2894        | NR754 <i>ΔmurJ::FRT ΔhsdR::kan</i> (pFLAGMurJΔCys/R24K)                                       | This study       |
| NR3058        | NR754 <i>ΔmurJ::FRT ΔhsdR::kan</i> (pFLAGMurJΔCys/R24A/M171R)                                 | This study       |
| NR3057        | NR754 (pFLAGMurJΔCys/R24A/M171R)                                                              | This study       |
| NR3138        | NR754 <i>ΔmurJ::FRT ΔhsdR::kan</i> (pFLAGMurJΔCys/A37D)                                       | This study       |
| NR3015        | NR754 <i>ΔmurJ::FRT ΔhsdR::kan</i> (pFLAGMurJΔCys/D39E)                                       | This study       |
| NR2990        | NR754 (pFLAGMurJΔCys/D39A)                                                                    | This study       |
| NR2682        | NR754 <i>ΔmurJ::FRT ΔhsdR::kan</i> (pFLAGMurJΔCys/D39N, pRC7MurJ)                             | This study       |
| NR3055        | NR754 (pFLAGMurJΔCys/D39N)                                                                    | This study       |
| NR2846        | NR754 <i>ΔmurJ::FRT ΔhsdR::kan</i> (pFLAGMurJΔCys/D39K, pRC7MurJ)                             | This study       |
| NR2852        | NR754 (pFLAGMurJΔCys/D39K)                                                                    | This study       |
| NR3020        | NR754 <i>ΔmurJ::FRT ΔhsdR::kan</i> (pFLAGMurJΔCys/D39A/A37D, pRC7MurJ)                        | This study       |
| NR3023        | NR754 (pFLAGMurJΔCys/D39A/A37D)                                                               | This study       |
| NR3140        | NR754 <i>ΔmurJ::FRT ΔhsdR::kan</i> (pFLAGMurJΔCys/D39A/M171R, pRC7MurJ)                       | This study       |
| NR3144        | NR754 (pFLAGMurJΔCys/D39A/M171R)                                                              | This study       |
| NR2683        | NR754 <i>ΔmurJ::FRT ΔhsdR::kan</i> (pFLAGMurJΔCys/K46A)                                       | (1)              |
| NR2991        | NR754 (pFLAGMurJΔCys/K46A)                                                                    | This study       |
| NR2844        | NR754 <i>ΔmurJ::FRT ΔhsdR::kan</i> (pFLAGMurJΔCys/K46E)                                       | This study       |
| NR2996        | NR754 (pFLAGMurJΔCys/K46E)                                                                    | This study       |
| NR2687        | NR754 <i>ΔmurJ::FRT ΔhsdR::kan</i> (pFLAGMurJΔCys/R52A)                                       | (1)              |
| NR2992        | NR754 (pFLAGMurJΔCys/R52A)                                                                    | This study       |
| NR2847        | NR754 <i>ΔmurJ::FRT ΔhsdR::kan</i> (pFLAGMurJΔCys/R52E, pRC7MurJ)                             | This study       |
| NR2853        | NR754 (pFLAGMurJΔCys/R52E)                                                                    | This study       |
| NR2895        | NR754 <i>ΔmurJ::FRT ΔhsdR::kan</i> (pFLAGMurJΔCys/R52K)                                       | This study       |
| NR3141        | NR754 <i>ΔmurJ::FRT ΔhsdR::kan</i> (pFLAGMurJΔCys/R52A/M171R, pRC7MurJ)                       | This study       |
| NR3145        | NR754 (pFLAGMurJΔCys/R52A/M171R)                                                              | This study       |
| NR3170        | NR754 <i>ΔmurJ::FRT ΔhsdR::kan</i> (pFLAGMurJΔCys/K74C)                                       | This study       |
| NR2614        | NR754 <i>ΔmurJ::FRT ΔhsdR::kan</i> (pFLAGMurJΔCys/E77C)                                       | This study       |
| NR2609        | NR754 <i>ΔmurJ::FRT ΔhsdR::kan</i> (pFLAGMurJΔCys/R81C)                                       | This study       |

| Strain | Genotype                                                                                 | Reference  |
|--------|------------------------------------------------------------------------------------------|------------|
| NR2637 | NR754 $\Delta murJ::FRT \Delta hsdR::kan$ (pFLAGMurJ $\Delta$ Cys/D122C)                 | This study |
| NR2813 | NR754 $\Delta murJ::FRT \Delta hsdR::kan$ (pFLAGMurJ $\Delta$ Cys/K123C)                 | This study |
| NR2815 | NR754 $\Delta murJ::FRT \Delta hsdR::kan$ (pFLAGMurJ $\Delta$ Cys/K132C)                 | This study |
| NR2638 | NR754 $\Delta murJ::FRT \Delta hsdR::kan$ (pFLAGMurJ $\Delta$ Cys/R156C)                 | This study |
| NR3075 | NR754 $\Delta murJ::FRT \Delta hsdR::kan$ (pFLAGMurJ $\Delta$ Cys/M171R)                 | This study |
| NR3056 | NR754 (pFLAGMurJ $\Delta$ Cys/M171R)                                                     | This study |
| NR2579 | NR754 $\Delta murJ::FRT \Delta hsdR::kan$ (pFLAGMurJ $\Delta$ Cys/K210C)                 | This study |
| NR2684 | NR754 $\Delta murJ::FRT \Delta hsdR::kan$ (pFLAGMurJ $\Delta$ Cys/D269A)                 | (1)        |
| NR2993 | NR754 (pFLAGMurJ $\Delta$ Cys/D269A)                                                     | This study |
| NR2848 | NR754 $\Delta murJ::FRT \Delta hsdR::kan$ (pFLAGMurJ $\Delta$ Cys/D269K, pRC7MurJ)       | This study |
| NR2854 | NR754 (pFLAGMurJ $\Delta$ Cys/D269K)                                                     | This study |
| NR2896 | NR754 $\Delta murJ::FRT \Delta hsdR::kan$ (pFLAGMurJ $\Delta$ Cys/D269E)                 | This study |
| NR2994 | NR754 (pFLAGMurJ $\Delta$ Cys/R270A)                                                     | This study |
| NR2849 | NR754 $\Delta murJ::FRT \Delta hsdR::kan$ (pFLAGMurJ $\Delta$ Cys/R270E, pRC7MurJ)       | This study |
| NR2855 | NR754 (pFLAGMurJ $\Delta$ Cys/R270E)                                                     | This study |
| NR2897 | NR754 $\Delta murJ::FRT \Delta hsdR::kan$ (pFLAGMurJ $\Delta$ Cys/R270K)                 | This study |
| NR3142 | NR754 $\Delta murJ::FRT \Delta hsdR::kan$ (pFLAGMurJ $\Delta$ Cys/R270A/M171R, pRC7MurJ) | This study |
| NR3146 | NR754 (pFLAGMurJ $\Delta$ Cys/R270A/M171R)                                               | This study |
| NR2712 | NR754 $\Delta murJ::FRT \Delta hsdR::kan$ (pFLAGMurJ $\Delta$ Cys/E273A)                 | (1)        |
| NR2995 | NR754 (pFLAGMurJ $\Delta$ Cys/E273A)                                                     | This study |
| NR2710 | NR754 $\Delta murJ::FRT \Delta hsdR::kan$ (pFLAGMurJ $\Delta$ Cys/E273D)                 | This study |
| NR2850 | NR754 $\Delta murJ::FRT \Delta hsdR::kan$ (pFLAGMurJ $\Delta$ Cys/E273R, pRC7MurJ)       | This study |
| NR2856 | NR754 (pFLAGMurJ $\Delta$ Cys/E273R)                                                     | This study |
| NR2466 | NR754 $\Delta murJ::FRT \Delta hsdR::kan$ (pFLAGMurJ $\Delta$ Cys/D301C)                 | This study |
| NR2816 | NR754 $\Delta murJ::FRT \Delta hsdR::kan$ (pFLAGMurJ $\Delta$ Cys/R305C)                 | This study |
| NR2582 | NR754 $\Delta murJ::FRT \Delta hsdR::kan$ (pFLAGMurJ $\Delta$ Cys/D308C)                 | This study |
| NR2468 | NR754 $\Delta murJ::FRT \Delta hsdR::kan$ (pFLAGMurJ $\Delta$ Cys/R312C)                 | This study |
| NR2641 | NR754 $\Delta murJ::FRT \Delta hsdR::kan$ (pFLAGMurJ $\Delta$ Cys/K341C)                 | This study |
| NR2615 | NR754 $\Delta murJ::FRT \Delta hsdR::kan$ (pFLAGMurJ $\Delta$ Cys/D346C)                 | This study |
| NR2642 | NR754 $\Delta murJ::FRT \Delta hsdR::kan$ (pFLAGMurJ $\Delta$ Cys/R352C)                 | This study |
| NR2652 | NR754 $\Delta murJ::FRT \Delta hsdR::kan$ (pFLAGMurJ $\Delta$ Cys/K368C)                 | This study |
| NR2616 | NR754 $\Delta murJ::FRT \Delta hsdR::kan$ (pFLAGMurJ $\Delta$ Cys/R377C)                 | This study |
| NR2819 | NR754 $\Delta murJ::FRT \Delta hsdR::kan$ (pFLAGMurJ $\Delta$ Cys/K381C)                 | This study |
| NR2613 | NR754 $\Delta murJ::FRT \Delta hsdR::kan$ (pFLAGMurJ $\Delta$ Cys/K385C)                 | This study |
| NR2697 | NR754 $\Delta murJ::FRT \Delta hsdR::kan$ (pFLAGMurJ $\Delta$ Cys/K406C)                 | This study |
| NR2699 | NR754 $\Delta murJ::FRT \Delta hsdR::kan$ (pFLAGMurJ $\Delta$ Cys/R430C)                 | This study |
| NR2700 | NR754 $\Delta murJ::FRT \Delta hsdR::kan$ (pFLAGMurJ $\Delta$ Cys/K431C)                 | This study |
| NR2701 | NR754 $\Delta murJ::FRT \Delta hsdR::kan$ (pFLAGMurJ $\Delta$ Cys/K433C)                 | This study |
| NR2709 | NR754 $\Delta murJ::FRT \Delta hsdR::kan$ (pFLAGMurJ $\Delta$ Cys/R447C)                 | This study |
| NR2931 | NR754 $\Delta murJ::FRT \Delta hsdR::kan$ (pFLAGMurJ $\Delta$ Cys/E468C)                 | This study |
| NR2702 | NR754 $\Delta murJ::FRT \Delta hsdR::kan$ (pFLAGMurJ $\Delta$ Cys/R477C)                 | This study |
| NR2703 | NR754 $\Delta murJ::FRT \Delta hsdR::kan$ (pFLAGMurJ $\Delta$ Cys/R480C)                 | This study |
| NR2820 | NR754 $\Delta murJ::FRT \Delta hsdR::kan$ (pFLAGMurJ $\Delta$ Cys/K502C)                 | This study |
| NR2704 | NR754 $\Delta murJ::FRT \Delta hsdR::kan$ (pFLAGMurJ $\Delta$ Cys/K504C)                 | This study |
| NR2705 | NR754 $\Delta murJ::FRT \Delta hsdR::kan$ (pFLAGMurJ $\Delta$ Cys/E505C)                 | This study |
| NR2706 | NR754 $\Delta murJ::FRT \Delta hsdR::kan$ (pFLAGMurJ $\Delta$ Cys/R509C)                 | This study |
| NR1305 | NR1152 (pCA24Not)                                                                        | (10)       |

| <b>Strain</b> | <b>Genotype</b>          | <b>Reference</b> |
|---------------|--------------------------|------------------|
| NR3128        | NR754 (pHIS-YtgP)        | This study       |
| NR3064        | NR1152 (pHIS-YtgP)       | This study       |
| NR3129        | NR754 (pHIS-YtgP/R29A)   | This study       |
| NR3067        | NR1152 (pHIS-YtgP/R29A)  | This study       |
| NR3130        | NR754 (pHIS-YtgP/R29K)   | This study       |
| NR3068        | NR1152 (pHIS-YtgP/R29K)  | This study       |
| NR3131        | NR754 (pHIS-YtgP/R152A)  | This study       |
| NR3073        | NR1152 (pHIS-YtgP/R152A) | This study       |
| NR3132        | NR754 (pHIS-YtgP/E171A)  | This study       |
| NR3074        | NR1152 (pHIS-YtgP/E171A) | This study       |
| NR3133        | NR754 (pHIS-YtgP/R175A)  | This study       |
| NR3069        | NR1152 (pHIS-YtgP/R175A) | This study       |
| NR3134        | NR754 (pHIS-YtgP/R175K)  | This study       |
| NR3070        | NR1152 (pHIS-YtgP/R175K) | This study       |
| NR3135        | NR754 (pHIS-YtgP/K301A)  | This study       |
| NR3071        | NR1152 (pHIS-YtgP/K301A) | This study       |
| NR3136        | NR754 (pHIS-YtgP/K301R)  | This study       |
| NR3072        | NR1152 (pHIS-YtgP/K301R) | This study       |

**Table S4. Primers used in this study.**

| <b>PRIMER</b> | <b>SEQUENCE 5'-3'</b>                              | <b>PURPOSE</b> |
|---------------|----------------------------------------------------|----------------|
| 5MurJR18E 2   | CTCGATGACCATGTTTTCGGAAGTGCTTGGCTTCGCACGAG          | SDM            |
| 3MurJR18E 2   | CTCGTGCGAAGCCAAGCACTTCCGAAAACATGGTCATCGAG          | SDM            |
| 5MurJR18K     | CGATGACCATGTTTTCGAAAGTGCTTGGCTTCGCAC               | SDM            |
| 3MurJR18K     | GTGCGAAGCCAAGCACTTTCGAAAACATGGTCATCG               | SDM            |
| 5MurJR24K     | GTGCTTGGCTTCGCAAAAGACGCAATTGTCG                    | SDM            |
| 3MurJR24K     | CGACAATTGCGTCTTTTGCGAAGCCAAGCAC                    | SDM            |
| 5MurJR24E     | GTGTGCTTGGCTTCGCAGAGGACGCAATTGTCGCCAG              | SDM            |
| 3MurJR24E     | CTGGCGACAATTGCGTCCTCTGCGAAGCCAAGCACAC              | SDM            |
| 5MurJA37D     | CTTTGGCGCAGGGATGGACACCGACGCCTTTTTTCG               | SDM            |
| 3MurJA37D     | CGAAAAAGGCGTCGGTGTCCATCCCTGCGCCAAAAG               | SDM            |
| 5MurJD39K     | GCAGGGATGGCAACCAAGGCCTTTTTCGTCGCT                  | SDM            |
| 3MurJD39K     | AGCGACGAAAAAGGCCTTGGTTGCCATCCCTGC                  | SDM            |
| 5MurJD39E     | GCAGGGATGGCAACCGAGGCCTTTTTCGTCGCTT                 | SDM            |
| 3MurJD39E     | AAGCGACGAAAAAGGCCTCGGTTGCCATCCCTGC                 | SDM            |
| 5MurJD39N     | CAGGGATGGCAACCAATGCCTTTTTTCGTCG                    | SDM            |
| 3MurJD39N     | CGACGAAAAAGGCATTGGTTGCCATCCCTGC                    | SDM            |
| 5MurJK46E     | GACGCCTTTTTCGTCGCTTTTGAGCTTCCTAACTTGTTACGCC        | SDM            |
| 3MurJK46E     | GGCGTAACAAGTTAGGAAGCTCAAAAAGCGACGAAAAAGGCGTC       | SDM            |
| 5MurJR52K     | TTCGTCGCTTTTAAACTTCCTAACTTGTTAAAGCGTATCTTTGCCGAAGG | SDM            |
| 3MurJR52K     | CCTTCGGCAAAGATACGCTTAAACAAGTTAGGAAGTTTAAAAGCGACGAA | SDM            |
| 5MurJR52E     | CGTCGCTTTTAAACTTCCTAACTTGTTAGAGCGTATCTTTGCCGAAG    | SDM            |
| 3MurJR52E     | CTTCGGCAAAGATACGCTCTAACAAGTTAGGAAGTTTAAAAGCGACG    | SDM            |
| 5MurJK74C     | GGCGGAATATAAAAAGTTGCCAGGGTGAAGACGCCAC              | SDM            |
| 3MurJK74C     | GTGGCGTCTTCACCTGGCAACTTTTATATTCCGCC                | SDM            |
| 5MurJE77C     | GAATATAAAAGTAAGCAGGGTTGCGACGCCACGCGGGTCTTTGTC      | SDM            |
| 3MurJE77C     | GACAAAGACCCGCGTGGCGTCGCAACCCTGCTTACTTTTATATTC      | SDM            |
| 5MurJR81C     | GGGTGAAGACGCCACGTGCGTCTTTGTCTCTTATGT               | SDM            |
| 3MurJR81C     | ACATAAGAGACAAAGACGCACGTGGCGTCTTCACCC               | SDM            |
| 5MurJD122C    | GGCTTCGCTGACACAGCTTGCAAATTTGCCCTGACCAG             | SDM            |
| 3MurJD122C    | CTGGTCAGGGCAAATTTGCAAGCTGTGTCAGCGAAGCC             | SDM            |
| 5MurJK123C    | TTCGCTGACACAGCTGACTGCTTTGCCCTGACCAGCCAG            | SDM            |
| 3MurJK123C    | CTGGCTGGTCAGGGCAAAGCAGTCAGCTGTGTCAGCGAA            | SDM            |
| 5MurJK132C    | GCCCTGACCAGCCAGCTACTATGCATTACCTTCCCTATATCTTG       | SDM            |
| 3MurJK132C    | CAAGATATAGGGAAAGGTAATGCATAGTAGCTGGCTGGTCAGGGC      | SDM            |
| 5MurJR156C    | GATTCTGAATACGTGGAAGTGTCTCGATTCCGGCGTTTG            | SDM            |
| 3MurJR156C    | CAAACGCCGGAATCGAGAAAACAGTTCCACGTATTCAGAATC         | SDM            |
| 5MurJM171R    | TGCTTAACATCAGCCGATTGGTTTCGCGCT                     | SDM            |
| 3MurJM171R    | AGCGCGAAACCAATCCGGCTGATGTAAAGCA                    | SDM            |

| <b>PRIMER</b> | <b>SEQUENCE 5'-3'</b>                             | <b>PURPOSE</b> |
|---------------|---------------------------------------------------|----------------|
| 5MurJK210C    | GCTACCGCACCTGAAGTGCATCGGCATGCTGGTCC               | SDM            |
| 3MurJK210C    | GGACCAGCATGCCGATGCACTTCAGGTGCGGTAGC               | SDM            |
| 5MurJD269E    | GATGTATTACGCCGAACGCTTAATGGAGTTTC                  | SDM            |
| 3MurJD269E    | GAAACTCCATTAAGCGTTCGGCGTAATACATC                  | SDM            |
| 5MurJD269K    | GTCTTGGATGTATTACGCCAAGCGCTTAATGGAGTTCCGT          | SDM            |
| 3MurJD269K    | ACGGAAACTCCATTAAGCGCTTGGCGTAATACATCCAAGAC         | SDM            |
| 5MurJR270K    | GGATGTATTACGCCGACAAGTTAATGGAGTTTCCGTCC            | SDM            |
| 3MurJR270K    | GGACGGAAACTCCATTAACTTGTTCGGCGTAATACATCC           | SDM            |
| 5MurJR270E    | CTTGGATGTATTACGCCGACGAGTTAATGGAGTTTCCGTCCGG       | SDM            |
| 3MurJR270E    | CCGGACGGAAACTCCATTAACTCGTCGGCGTAATACATCCAAG       | SDM            |
| 5MurJE273D    | CGACCGCTTAATGGATTTTCCGTCCGGTGTG                   | SDM            |
| 3MurJE273D    | CACACCGGACGGAAAATCCATTAAGCGGTTCG                  | SDM            |
| 5MurJE273R    | CGCCGACCGCTTAATGAGGTTTCCGTCCGGTGT                 | SDM            |
| 3MurJE273R    | ACACCGGACGGAAACCTCATTAAAGCGGTCCGGCG               | SDM            |
| 5MurJD301C    | GAAAAGTTTGGCCAGTGGCAATCATTGTGAATACAACCGTTTGTATGG  | SDM            |
| 3MurJD301C    | CCATCAAACGGTTGTATTACAATGATTGCCACTGGCAAACTTTTC     | SDM            |
| 5MurJR305C    | CAATCATGATGAATACAACCTGCTTGTGACTGGGGGTTGC          | SDM            |
| 3MurJR305C    | GCAACCCCAAGTCCATCAAGCAGTTGTATTCATCATGATTG         | SDM            |
| 5MurJD308C    | ATGAATACAACCGTTTGTATGTGCTGGGGGTTGCGTCTTAGC        | SDM            |
| 3MurJD308C    | GCTAAGACGCAACCCCAAGCACATCAAACGGTTGTATTCAT         | SDM            |
| 5MurJR312C    | GATGGACTGGGGGTTGTGTCTTAGCTTCCTGTT                 | SDM            |
| 3MurJR312C    | AACAGGAAGCTAAGACACAACCCCAAGTCCATC                 | SDM            |
| 5MurJK341C    | GTTTCGCTGTTCCAGTACGGTTGCTTTACCGCGTTTGTATGCGCTG    | SDM            |
| 3MurJK341C    | CAGCGCATCAAACGCGGTAAAGCAACCGTACTGGAACAGCGAAAC     | SDM            |
| 5MurJD346C    | CCAGTACGGTAAATTTACCGCGTTTGTGCGCTGATGACC           | SDM            |
| 3MurJD346C    | GGTCATCAGCGCACAAAACGCGGTAAATTTACCGTACTGG          | SDM            |
| 5MurJR352C    | GCGCTGATGACCCAGTGCAGCTTAATTGCCTAC                 | SDM            |
| 3MurJR352C    | GTAGGCAATTAACGCGCACTGGGTCATCAGCGC                 | SDM            |
| 5MurJK368C    | GTTTGTATTGGCCTGATTGTAGTGTGCGTGTGGCTCCTGGCTTTTATTC | SDM            |
| 3MurJK368C    | GAATAAAAGCCAGGAGCCAACACGCACACTACAATCAGGCCAATCAAAC | SDM            |
| 5MurJR377C    | GGCTCCTGGCTTTTATTCCCTGTCAGGACATTA AAAACGCCAG      | SDM            |
| 3MurJR377C    | CTGGCGTTTTAATGTCCTGACAGGAATAAAAAGCCAGGAGCC        | SDM            |
| 5MurJK381C    | CTCCTGGCTTTTATTCCCGCCAGGACATTTGTACGCCAGTGAAAATT   | SDM            |
| 3MurJK381C    | AATTTTCACTGGCGTACAAATGTCCTGGCGGAATAAAAAGCCAGGAG   | SDM            |
| 5MurJK385C    | CCAGGACATTA AAAACGCCAGTGTGCATTGCCATCGTTACGCTGATTT | SDM            |
| 3MurJK385C    | AAATCAGCGTAACGATGGCAATGCACACTGGCGTTTTAATGTCCTGG   | SDM            |
| 5MurJK406C    | GGCGTTTATTGGTCCGTTGTGCCATGCCGGGCTGTCACTTT         | SDM            |
| 3MurJK406C    | AAAGTGACAGCCCGCATGGCACAACGGACCAATAAACGCC          | SDM            |
| 5MurJR430C    | GCTGCTTTACTGGCAGTTGTGCAAGCAGAAAATCTTTACCC         | SDM            |
| 3MurJR430C    | GGGTAAAGATTTTCTGCTTGCACTGCCAGTAAAGCAGC            | SDM            |
| 5MurJK431C    | CTGCTTTACTGGCAGTTGCGTTGCCAGAAAATCTTTACCCCGCAA     | SDM            |
| 3MurJK431C    | TTGCGGGGTAAAGATTTTCTGGCAACGCAACTGCCAGTAAAGCAG     | SDM            |

| <b>PRIMER</b> | <b>SEQUENCE 5'-3'</b>                          | <b>PURPOSE</b>            |
|---------------|------------------------------------------------|---------------------------|
| 5MurJK433C    | CTGGCAGTTGCGTAAGCAGTGCATCTTTACCCCGCAACCCG      | SDM                       |
| 3MurJK433C    | CGGGTTGCGGGGTAAAGATGCACTGCTTACGCAACTGCCAG      | SDM                       |
| 5MurJR447C    | GATGGCGTTTCTGTTGTGCCTGGTGGTGGCGGTAC            | SDM                       |
| 3MurJR447C    | GTACCGCCACCACCAGGCACAACAGAAACGCCATC            | SDM                       |
| 5MurJE468C    | GGTATGTTACATATCATGCCGTGCTGGTCATTGGGTACCATGCC   | SDM                       |
| 3MurJE468C    | GGGCATGGTACCCAATGACCAGCACGGCATGATATGTAACATAACC | SDM                       |
| 5MurJR477C    | TGGGTACCATGCCCTGGTGGTACTGCGTTTAAATGGC          | SDM                       |
| 3MurJR477C    | GCCATTAACGCAGTAAGCACCAGGGCATGGTACCCA           | SDM                       |
| 5MurJR480C    | GCCCTGGCGTTTACTGTGCTTAAATGGCGGTCTGTC           | SDM                       |
| 3MurJR480C    | GCACGACCGCCATTAAGCACAGTAAACGCCAGGGC            | SDM                       |
| 5MurJK502C    | ACTGGCGGTACTGGGCTTCTGCGTTAAAGAATTTGCCCGCC      | SDM                       |
| 3MurJK502C    | GGCGGGCAAATTCCTTAACGCAGAAGCCCAGTACCGCCAGT      | SDM                       |
| 5MurJK504C    | GGTACTGGGCTTCAAAGTTTGCGAATTTGCCCGCCGGACGG      | SDM                       |
| 3MurJK504C    | CCGTCCGGCGGGCAAATTCGCAAACCTTTGAAGCCCAGTACC     | SDM                       |
| 5MurJE505C    | GGCGGTACTGGGCTTCAAAGTTAAATGCTTTGCCCGCCGGAC     | SDM                       |
| 3MurJE505C    | GTCCGGCGGGCAAAGCATTAACTTTGAAGCCCAGTACCGCC      | SDM                       |
| 5MurJR509C    | TTAAAGAATTTGCCCGCTGCACGGTGTAAAGGGTTCGAC        | SDM                       |
| 3MurJR509C    | GTGCACCCTTACACCGTGCAGCGGGCAAATTCCTTAA          | SDM                       |
| Sp5ORF0390    | GCCTCGACAGAAAAAAAAACAACCTGACACAAGAAGAATTG      | pHIS-YtgP<br>construction |
| Sp3ORF0390    | CCATGCCAGCCTAATTTCTGACGAAGGCGACT               | pHIS-YtgP<br>construction |
| 5SpyMurJR29A  | GCTGGTAATTTTCATTAGCGCACTTTTGGGAGTGTTATAC       | SDM                       |
| 3SpyMurJR29A  | GTATAACTCCCAAAGTGCCTAATGAAATTACCAGC            | SDM                       |
| 5SpyMurJR29K  | GCTGGTAATTTTCATTAGCAAACCTTTTGGGAGTGTTAT        | SDM                       |
| 3SpyMurJR29K  | ATAACTCCCAAAGTTTGCTAATGAAATTACCAGC             | SDM                       |
| 5SpyMurJR152A | CCTGTAATGAGTGTTCATTGCAAGTATCTTTCAAGGCC         | SDM                       |
| 3SpyMurJR152A | GGCCTTGAAAGATACCTGCAATGACTCATTACAGG            | SDM                       |
| 5SpyMurJE171A | GATTAGTCAGATTGCTGCCCAACTCATTGCGGTTATC          | SDM                       |
| 3SpyMurJE171A | GATAACCCGAATGAGTTGGGCAGCAATCTGACTAATC          | SDM                       |
| 5SpyMurJR175A | CTGAGCAACTCATTGCGGTTATCTGGATG                  | SDM                       |
| 3SpyMurJR175A | CATCCAGATAACCGCAATGAGTTGCTCAG                  | SDM                       |
| 5SpyMurJR175K | GATTGCTGAGCAACTCATTAAGGTTATCTGGATGCTTTTG       | SDM                       |
| 3SpyMurJR175K | CAAAAGCATCCAGATAACCTTAATGAGTTGCTCAGCAATC       | SDM                       |
| 5SpyMurJK301A | CTTTAACGCAAACCCAGCCGCAATTACAATGGTCTTAATTG      | SDM                       |
| 3SpyMurJK301A | CAATTAAGACCATTGTAATTGCGGCTGGGTTTGCCTTAAAG      | SDM                       |
| 5SpyMurJK301R | CTTTAACGCAAACCCAGCCAGGATTACAATGGTCTTAATTG      | SDM                       |
| 3SpyMurJK301R | CAATTAAGACCATTGTAATCCTGGCTGGGTTTGCCTTAAAG      | SDM                       |

## References:

1. **Butler, E.K., R.M. Davis, V. Bari, P.A. Nicholson, N. Ruiz.** 2013. Structure-function analysis of MurJ reveals a solvent-exposed cavity containing residues essential for peptidoglycan biogenesis in *Escherichia coli*. *J. Bacteriol.* **195**(20): 4639-4649.
2. **Beitz, E.** 2000. TEXtopo: shaded membrane protein topology plots in LaTeX2ε. *Bioinformatics* **16**(11): 1050-1051.
3. **Sievers, F., A. Wilm, D. Dineen, T.J. Gibson, K. Karplus, W. Li, R. Lopez, H. McWilliam, M. Remmert, J. Soding, J.D. Thompson, D.G. Higgins.** 2011. Fast, scalable generation of high-quality protein multiple sequence alignments using Clustal Omega. *Mol. Syst. Biol.* **7**.
4. **Waterhouse, A.M., J.B. Procter, D.M.A. Martin, M. Clamp, G.J. Barton.** 2009. Jalview Version 2—a multiple sequence alignment editor and analysis workbench. *Bioinformatics*, **25**(9): 1189-1191.
5. **Shindyalov, I.N., P.E. Bourne.** 1998. Protein structure alignment by incremental combinatorial extension (CE) of the optimal path. *Protein Eng.* **11**(9): 739-747.
6. **Chen, V.B., W.B. Arendall, III, J.J. Headd, D.A. Keedy, R.M. Immormino, G.J. Kapral, L.W. Murray, J.S. Richardson, D.C. Richardson.** 2010. MolProbity: all-atom structure validation for macromolecular crystallography. *Acta Crystallogr. D.* **66**(1): 12-21.
7. **Casadaban, M.J.** 1976. Transposition and fusion of the *lac* genes to selected promoters in *Escherichia coli* using bacteriophage lambda and Mu. *J. Molec. Biol.* **104**(3): 541-555.

8. **Ruiz, N., L.S. Gronenberg, D. Kahne, T.J. Silhavy.** 2008. Identification of two inner-membrane proteins required for the transport of lipopolysaccharide to the outer membrane of *Escherichia coli*. *Proc. Natl. Acad. Sci. U. S. A.* **105**(14): 5537-5542.
9. **Ruiz, N.** 2008. Bioinformatics identification of MurJ (MviN) as the peptidoglycan lipid II flippase in *Escherichia coli*. *Proc. Natl. Acad. Sci. U. S. A.* **105**(40): 15553-15557.
10. **Ruiz, N.** 2009. *Streptococcus pyogenes* YtgP (Spy\_0390) complements *Escherichia coli* strains depleted of the putative peptidoglycan flippase, MurJ. *Antimicrob. Agents Chemother.* **53**(8): 3604-3605.
